# Supplementary material for: Mononuclear, hexanuclear and polymeric indium(iii) pyrazolido complexes; structural characterization, dynamic solution studies and luminescent properties
Source: Royal Society of Chemistry journal article supplement (doi:10.1039/d2dt01901a), 2022-01-01
Supplement: d2dt01901a1.pdf [file d2dt01901a1.pdf]

Supplementary Information

**Mononuclear, hexanuclear and polymeric indium(III) pyrazolido complexes;  
Structural characterization, dynamic solution studies and luminescent properties**

Susana Herrera, Kennett Rivero, Alexis Guzmán, Jonathan Cedeño, Jaroslava Miksovská,\* and Raphael G. Raptis.\*

**Table S1.** Selected bond lengths (Å) and angles (°) for complexes **1** - **5**.

|          | <b>1</b>             | <b>2</b>             | <b>3</b>             | <b>4</b>             | <b>5</b>             |
|----------|----------------------|----------------------|----------------------|----------------------|----------------------|
| In-Cl    | 2.47(1) <sup>a</sup> | 2.44(1) <sup>a</sup> | 2.48(7) <sup>a</sup> | 2.48(1) <sup>a</sup> | 2.51(1) <sup>a</sup> |
|          | 2.45(3) <sup>b</sup> | 2.45(5) <sup>b</sup> | 2.45(1) <sup>a</sup> | 2.46(1) <sup>a</sup> | 2.46(3) <sup>b</sup> |
|          | 2.48(4) <sup>a</sup> | 2.47(5) <sup>a</sup> | 2.45(1) <sup>b</sup> | 2.45(1) <sup>b</sup> | 2.46(1) <sup>a</sup> |
| In-N     | 2.26(1) <sup>a</sup> | 2.26(1) <sup>a</sup> | 2.26(1) <sup>a</sup> | 2.26(1) <sup>a</sup> | 2.30(1) <sup>a</sup> |
|          | 2.30(1) <sup>b</sup> | 2.30(3) <sup>b</sup> | 2.27(1) <sup>a</sup> | 2.27(1) <sup>a</sup> | 2.29(1) <sup>b</sup> |
|          | 2.26(1) <sup>a</sup> | 2.27(1) <sup>a</sup> | 2.31(1) <sup>b</sup> | 2.32(1) <sup>b</sup> | 2.29(3) <sup>a</sup> |
| N-In-N   | 84.67(7), 85.76(7)   | 88.07(8), 90.77(8)   | 81.8(2), 90.5(2)     | 81.3(3), 89.4(3)     | 87.0(1), 87.7(1)     |
|          | 170.36(7)            | 177.79(8)            | 172.3(2)             | 170.6(3)             | 174.7(2)             |
| Cl-In-N  | 84.94(5) - 95.99(5)  | 84.65(5) - 93.50(6)  | 85.9(2) - 94.4(2)    | 86.3(2) - 94.8(2)    | 84.6(1) - 94.2(1)    |
|          | 176.60(5)            | 175.17(6)            | 176.0(2)             | 175.9(2)             | 176.2(1)             |
| Cl-In-Cl | 95.46(2), 92.15(2)   | 93.07(3), 95.88(3)   | 92.14(6), 95.47(6)   | 92.28(9), 95.10(9)   | 90.70(5), 91.14(5)   |
|          | 172.39(2)            | 170.94(2)            | 172.28(6)            | 172.49(9)            | 176.58(5)            |

<sup>a</sup>-*trans*-Cl-In-Cl, or *trans*-N-In-N bonds <sup>b</sup>-*trans*-Cl-In-N bonds.

**Table S2.** Selected bond lengths (Å) for **7** - **9**.

| Bond Length (Å)                         | <b>7</b>          | <b>8</b>          | <b>9</b>         |
|-----------------------------------------|-------------------|-------------------|------------------|
| In-In <sup>a</sup>                      | 3.36(1) - 3.40(4) | 3.36(8) - 3.42(9) | 3.41(6)          |
| In-In <sup>b</sup>                      | 3.67(2) - 3.74(6) | 3.70(4) - 3.73(1) | 3.70(5)          |
| In-Cl                                   | 2.46(7)           | 2.48(3)           | 2.45(4)          |
|                                         | 2.47(6)           | 2.50(1)           | 2.46(3)          |
|                                         | 2.48(3)           | 2.47(4)           | 2.46(3)          |
|                                         | 2.47(2)           | 2.48(5)           | 2.45(2)          |
|                                         | 2.49(2)           | 2.46(2)           | 2.45(6)          |
|                                         | 2.48(4)           | 2.46(1)           | 2.46(2)          |
| In-(μ-OH)                               | 2.18(5), 2.19(9)  | 2.18(8), 2.16(7)  | 2.20(4), 2.19(7) |
|                                         | 2.19(2), 2.19(5)  | 2.18(5), 2.18(2)  | 2.18(3), 2.18(6) |
|                                         | 2.18(4), 2.19(5)  | 2.18(5), 2.17(7)  | 2.18(1), 2.18(3) |
|                                         | 2.19(5), 2.20(6)  | 2.19(7), 2.18(8)  | 2.20(3), 2.21(1) |
|                                         | 2.18(7), 2.20(5)  | 2.17(6), 2.18(2)  | 2.18(9), 2.18(7) |
| In-N                                    | 2.17(6), 2.19(3)  | 2.20(1), 2.20(7)  | 2.17(9), 2.18(1) |
|                                         | 2.20(8), 2.21(4)  | 2.21(8), 2.21(6)  | 2.22(5), 2.22(9) |
|                                         | 2.20(7), 2.23(7)  | 2.21(4), 2.21(1)  | 2.23(5), 2.22(2) |
|                                         | 2.20(9), 2.21(1)  | 2.21(6), 2.22(8)  | 2.22(5), 2.21(7) |
|                                         | 2.20(2), 2.19(7)  | 2.20(3), 2.22(4)  | 2.22(1), 2.22(4) |
|                                         | 2.21(2), 2.20(8)  | 2.22(4), 2.22(4)  | 2.22(1), 2.22(9) |
| In-(μ <sub>3</sub> -OH <sub>0.5</sub> ) | 2.22(2), 2.21(1)  | 2.21(1), 2.23(7)  | 2.21(8), 2.22(1) |
|                                         | 2.20(1)           | 2.20(1)           | 2.18(1)          |
|                                         | 2.17(3)           | 2.17(3)           | 2.19(1)          |
|                                         | 2.20(5)           | 2.19(9)           | 2.19(4)          |
|                                         | 2.19(1)           | 2.16(4)           | 2.18(2)          |
|                                         | 2.16(9)           | 2.19(5)           | 2.19(8)          |
| 2.18(2)                                 | 2.17(3)           | 2.20(3)           |                  |

<sup>a</sup>(μ-OH) bridged; <sup>b</sup>(μ-pz) bridged.

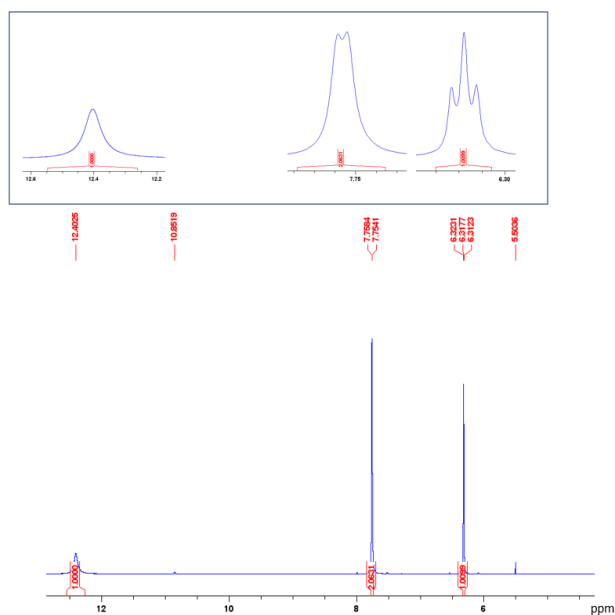

Fig. S2.  $^1\text{H}$  NMR spectrum of complex 1 in  $\text{THF-}d_8$  at RT.

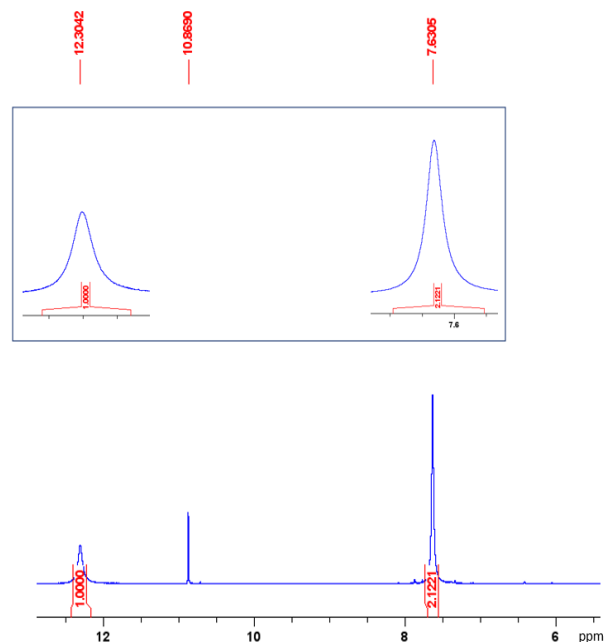

Fig. S3.  $^1\text{H}$  NMR spectrum of complex 2 in  $\text{THF-}d_8$  at RT.

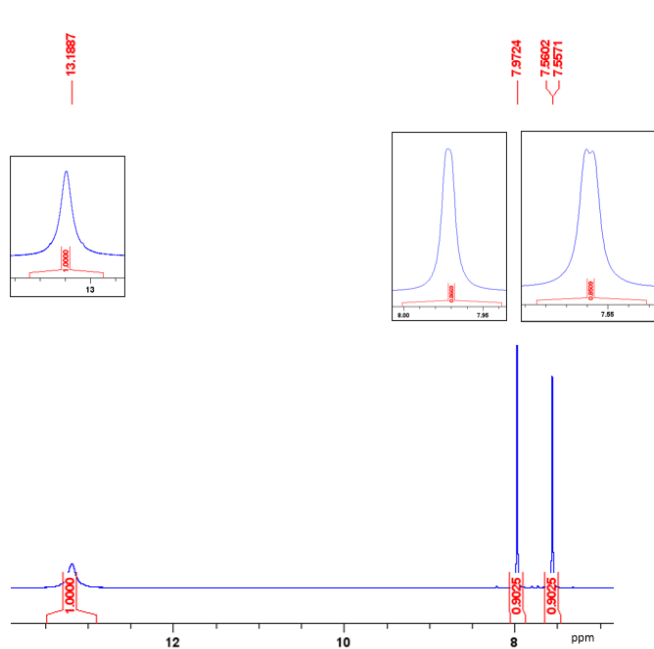

Fig. S4.  $^1\text{H}$  NMR spectrum of complex 3 in  $\text{DMSO-}d_6$  at RT.

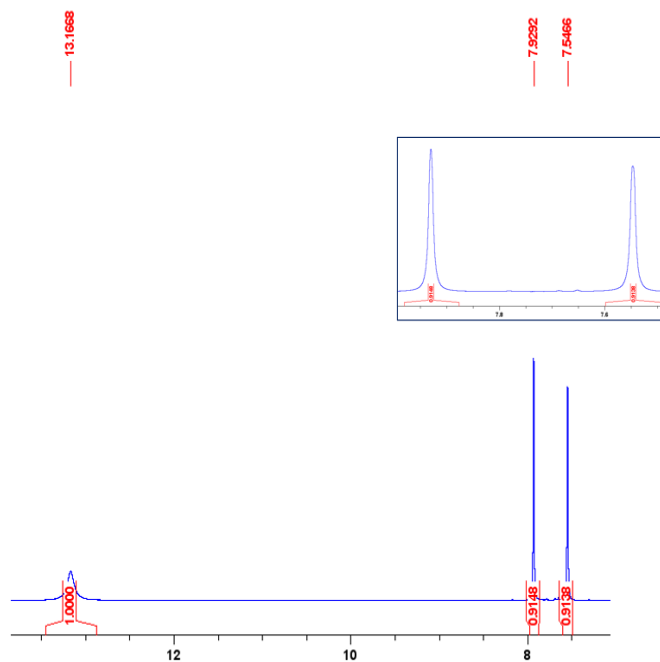

Fig. S5.  $^1\text{H}$  NMR spectrum of complex 4 in  $\text{DMSO-}d_6$  at RT.

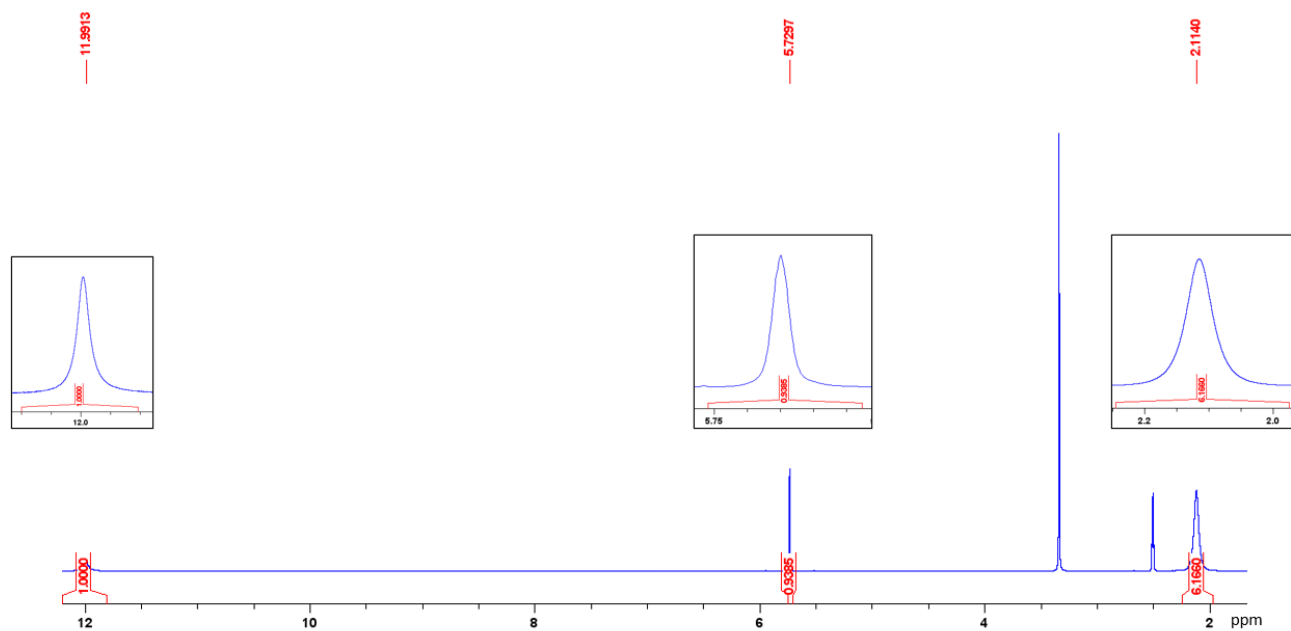

Fig. S6.  $^1\text{H}$  NMR spectrum of complex **5** in  $\text{DMSO-}d_6$  at RT.

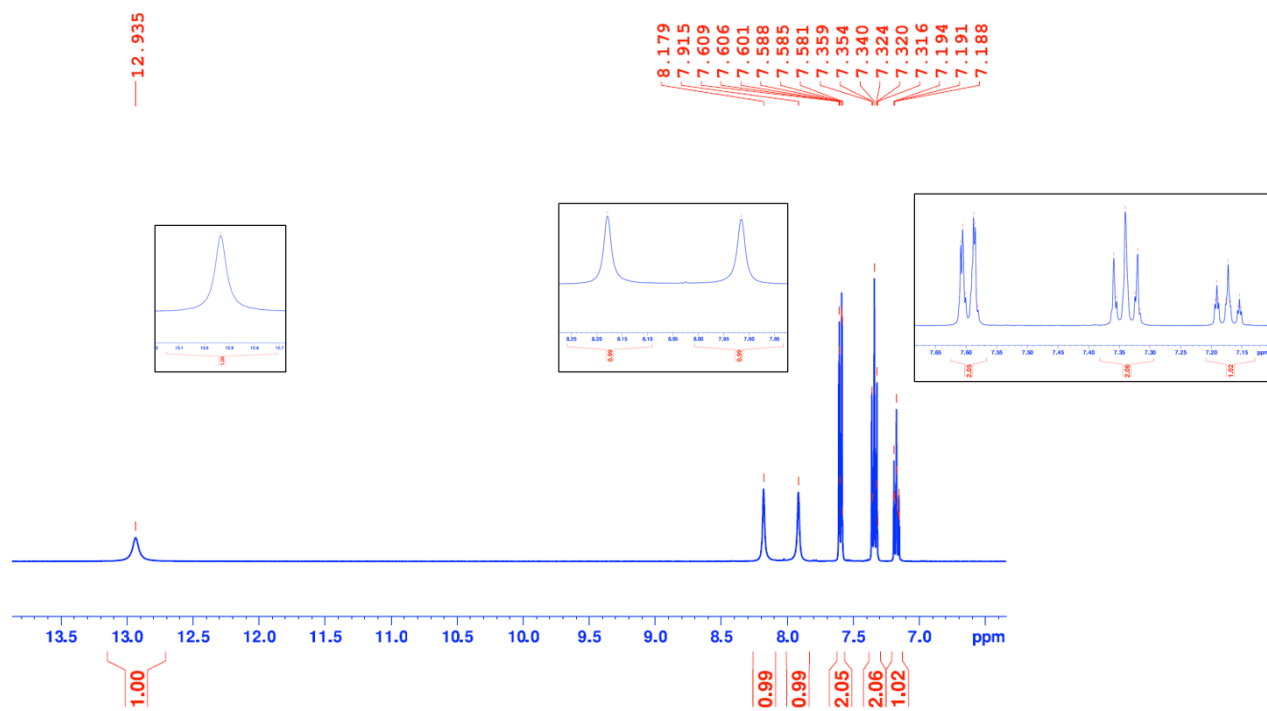

Fig. S7.  $^1\text{H}$  NMR spectrum of complex **6** in  $\text{DMSO-}d_6$  at RT.

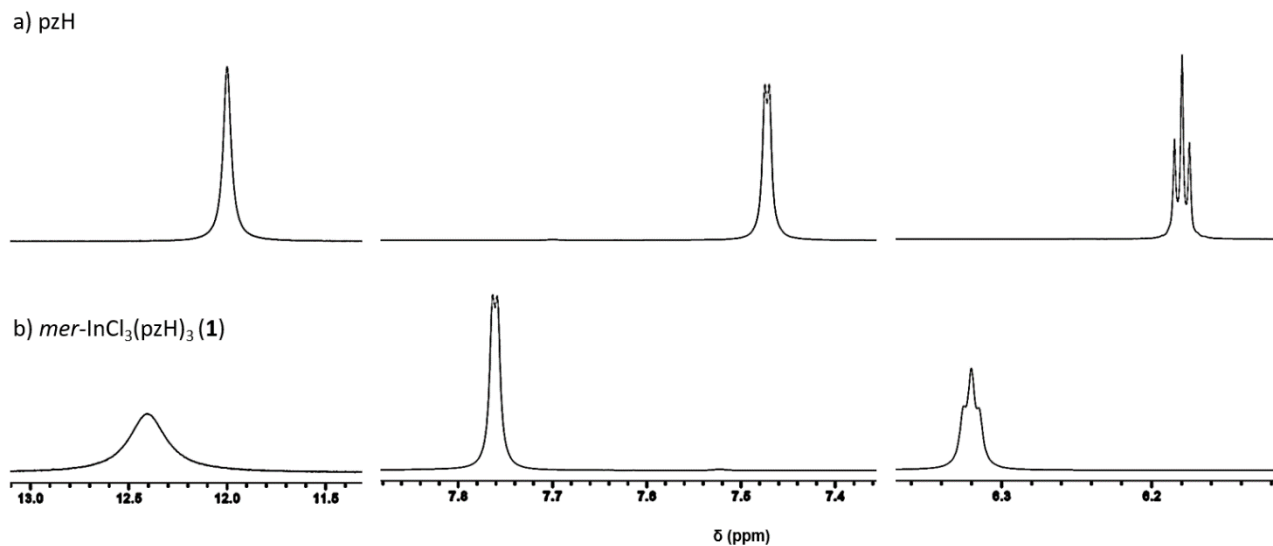

Fig. S8.  $^1\text{H}$  NMR spectrum of a) pzH in  $\text{THF-}d_8$  at RT and b)  $mer\text{-InCl}_3(\text{pzH})_3$  (**1**) in  $\text{THF-}d_8$  at RT.

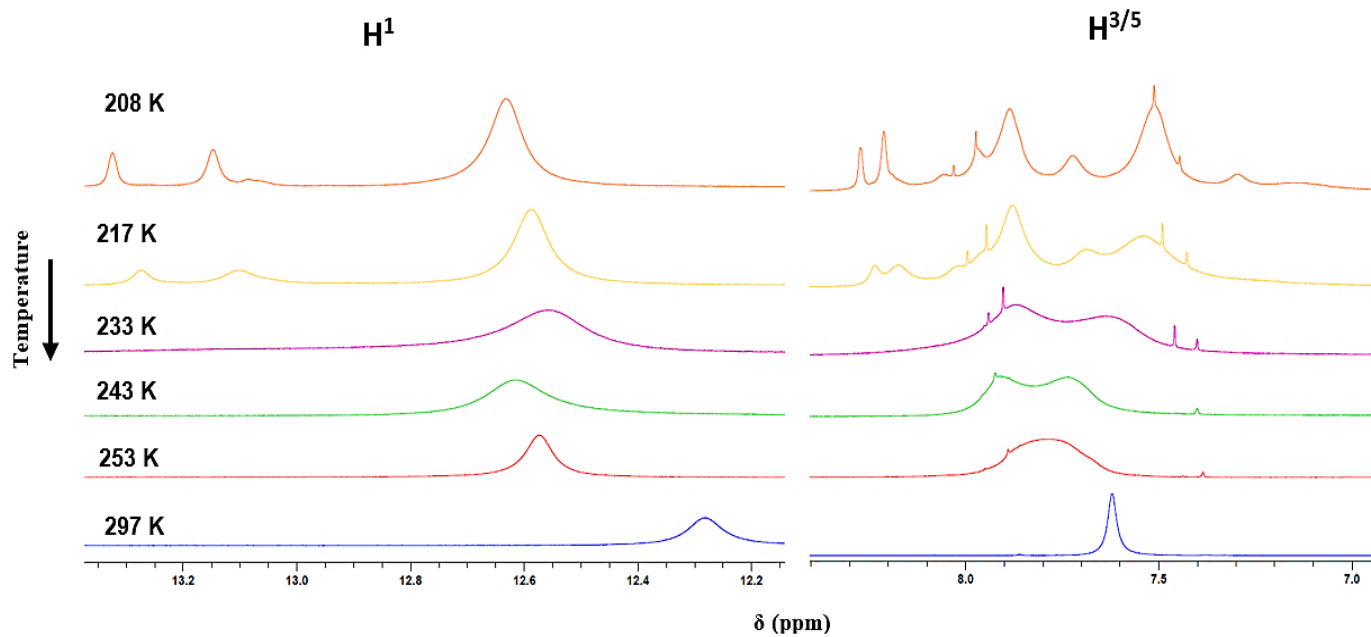

Fig. S9. VT  $^1\text{H}$  NMR of  $mer\text{-InCl}_3(4\text{-Cl-pzH})_3$  (**2**) in  $\text{THF-}d_8$  400 MHz.

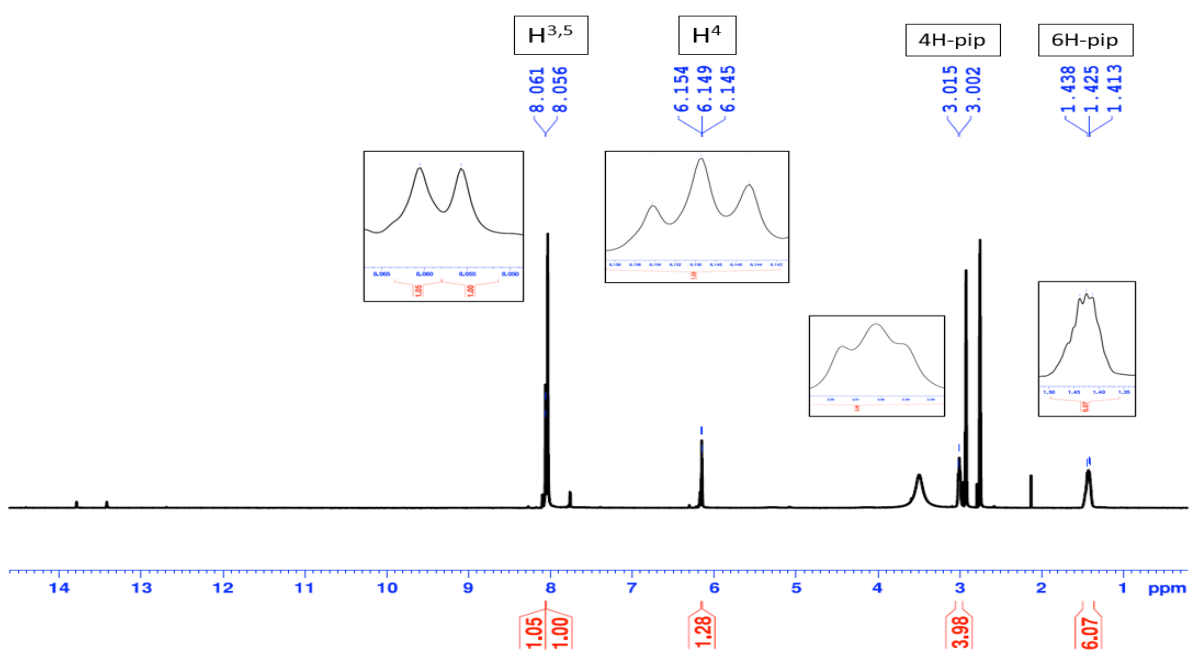

Fig. S10.  $^1\text{H}$  NMR of  $(\text{pipH})_3[\text{In}_6\text{Cl}_6(\mu_3\text{-OH}_{0.5})_2(\mu\text{-OH})_6(\mu\text{-pz})_6]$  (**7**) in  $\text{DMF-}d_7$ , 400 MHz, at RT.

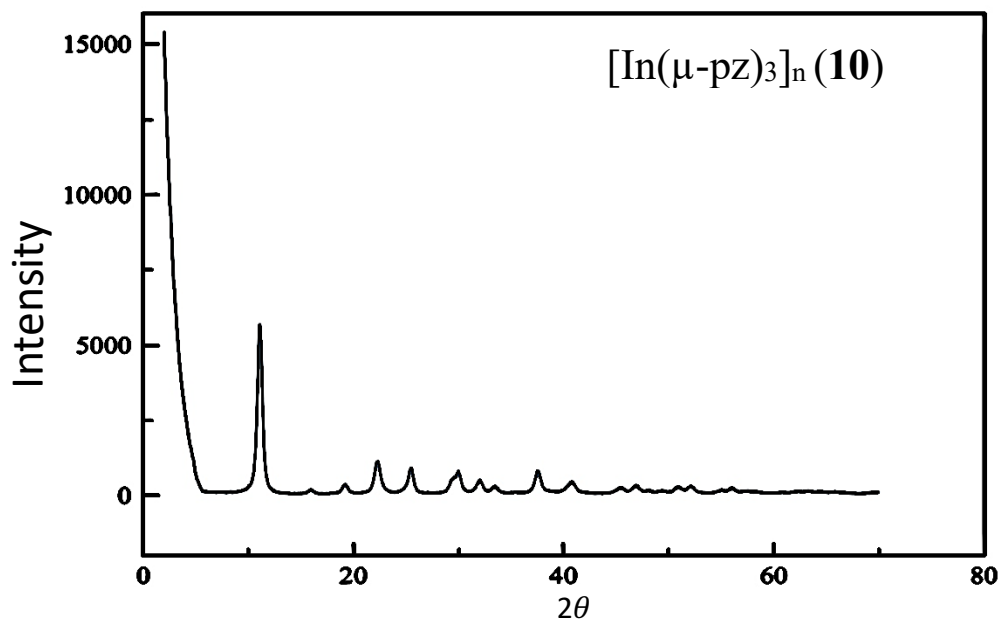

Fig. S11. PXRD pattern for  $[\text{In}(\mu\text{-pz})_3]_n$  (**10**).

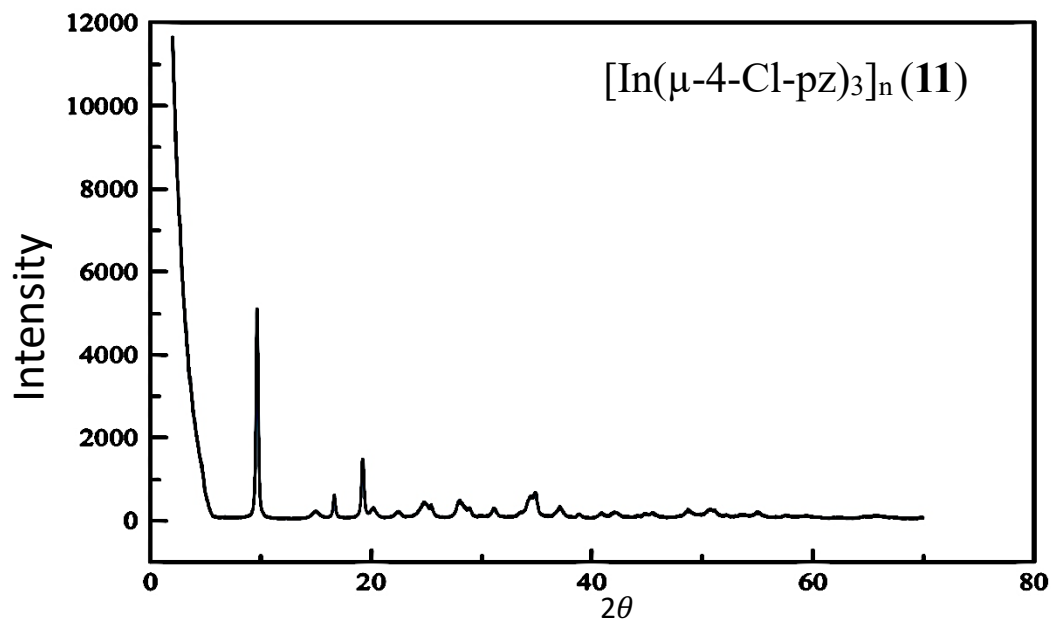

Fig. S12. PXRD pattern for  $[\text{In}(\mu\text{-4-Cl-pz})_3]_n$  (**11**).

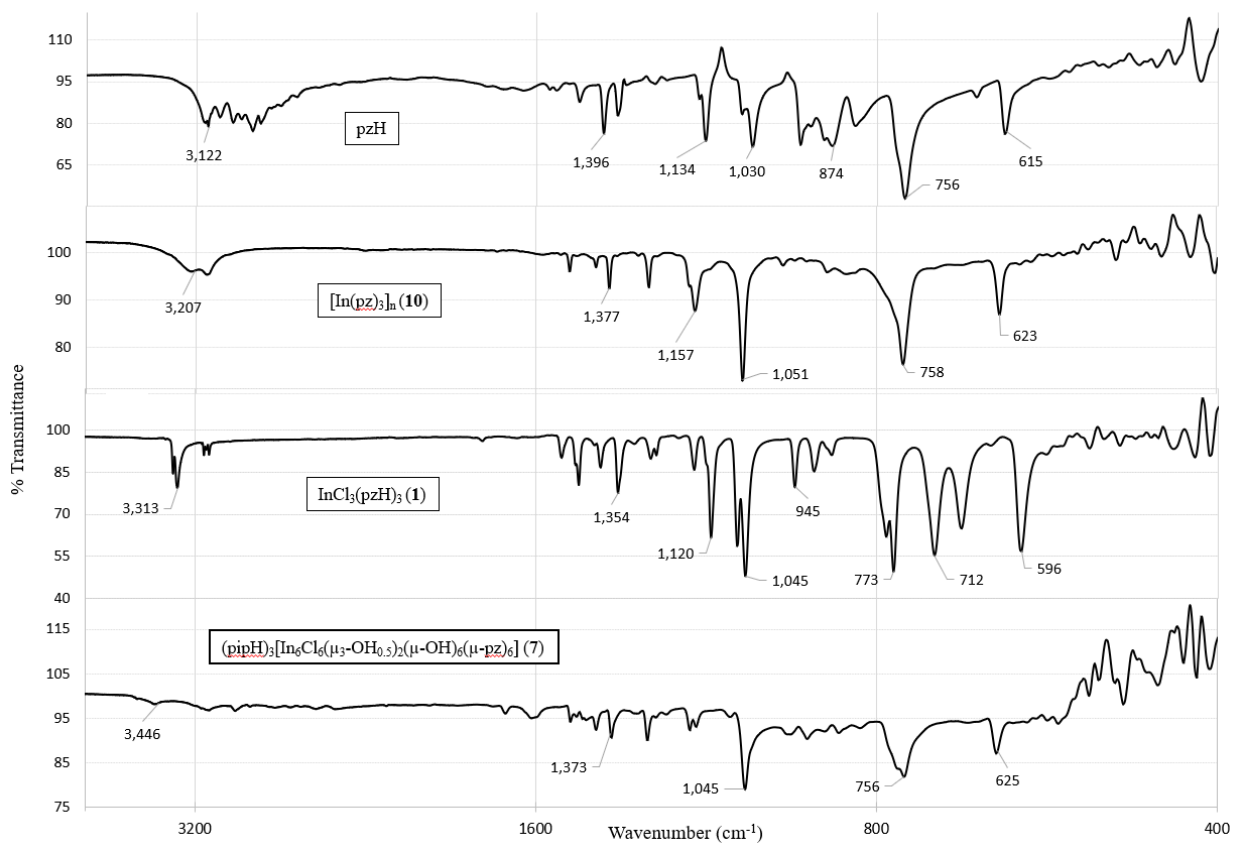

Fig. S13. FT-IR spectra of pzH (top),  $[\text{In}(\mu\text{-pz})_3]_n$  (**10**),  $\text{mer-InCl}_3(\mu\text{-pzH})_3$  (**1**),  $(\text{pipH})_3[\text{In}_6\text{Cl}_6(\mu_3\text{-OH}_{0.5})_2(\mu\text{-OH})_6(\mu\text{-pz})_6]$  (**7**).

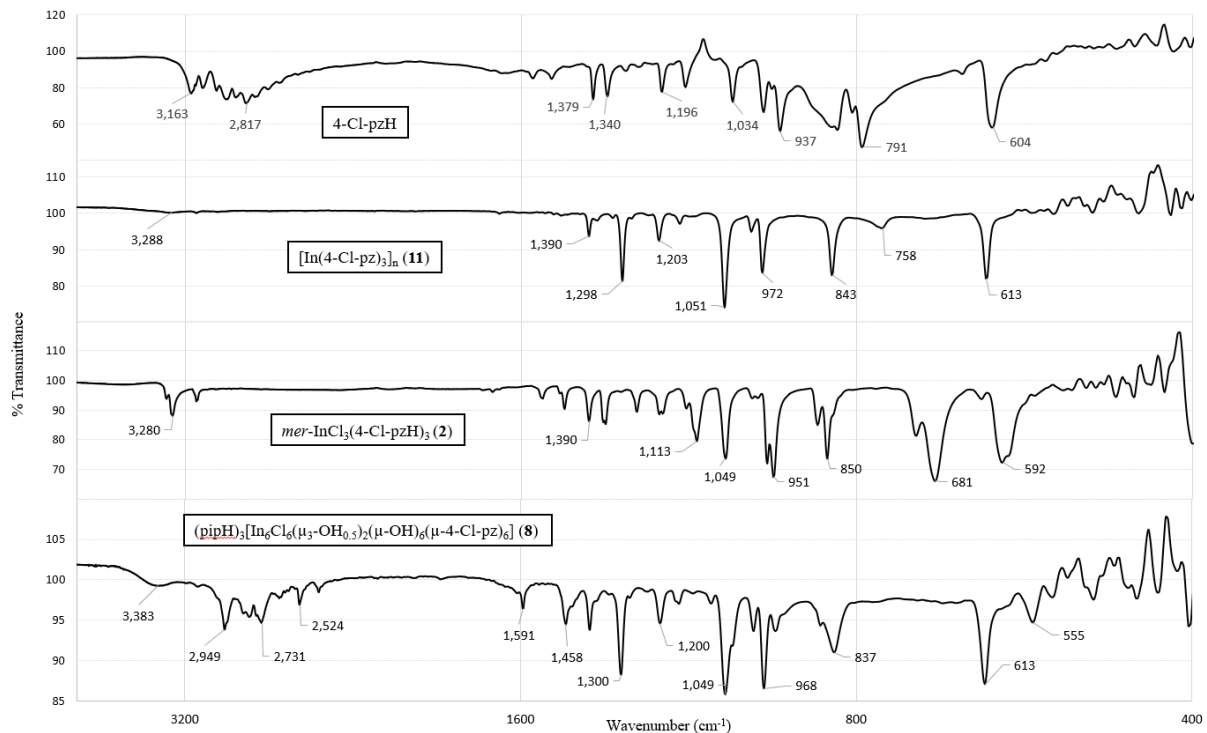

**Fig.S14.** FT-IR spectra of 4-Cl-pzH (top), [In(μ-4-Cl-pz)<sub>3</sub>]<sub>n</sub> (**11**), mer-InCl<sub>3</sub>(4-Cl-pzH)<sub>3</sub> (**2**), (pipH)<sub>3</sub>[In<sub>6</sub>Cl<sub>6</sub>(μ<sub>3</sub>-OH<sub>0.5</sub>)<sub>2</sub>(μ-OH)<sub>6</sub>(μ-4-Cl-pz)<sub>6</sub>] (**8**).

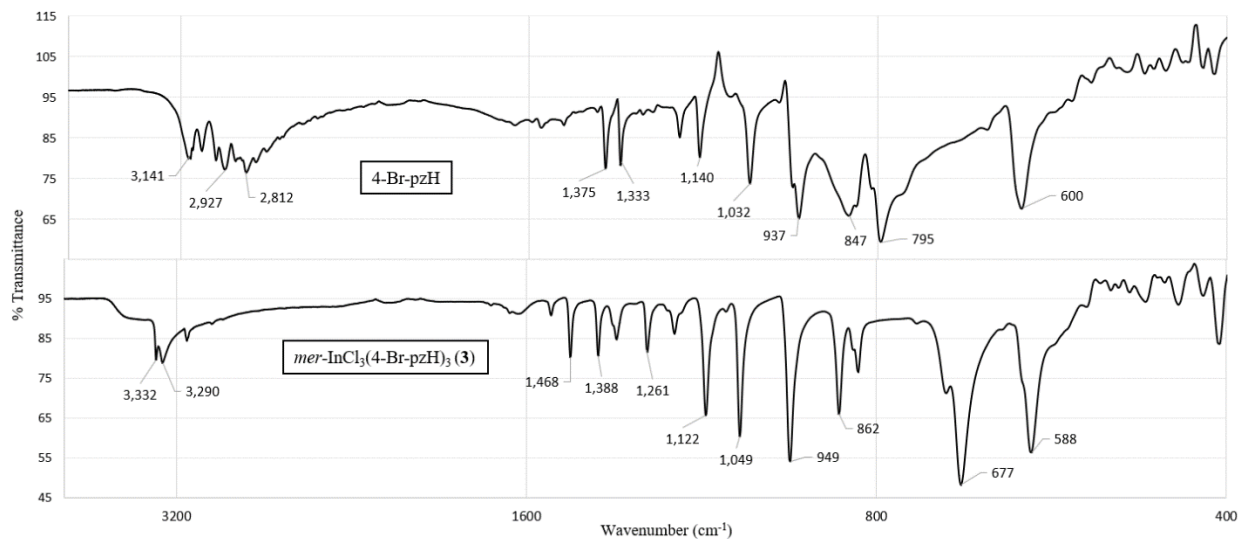

**Fig. S15.** FT-IR spectra of 4-Br-pzH (top) and mer-InCl<sub>3</sub>(4-Br-pzH)<sub>3</sub> (**3**).

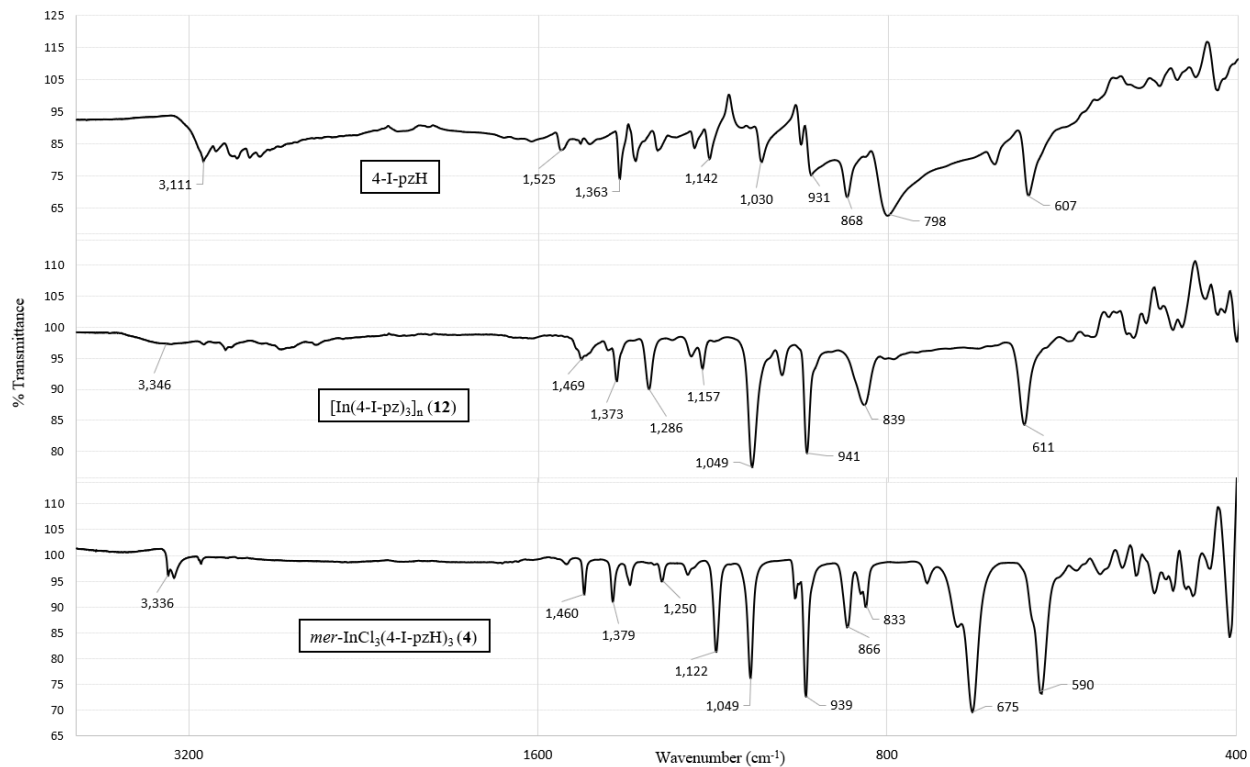

**Fig. S16.** FT-IR spectra of 4-I-pzH (top), [In(μ-4-I-pz)<sub>3</sub>]<sub>n</sub> (12), mer-InCl<sub>3</sub>(4-I-pzH)<sub>3</sub> (4).

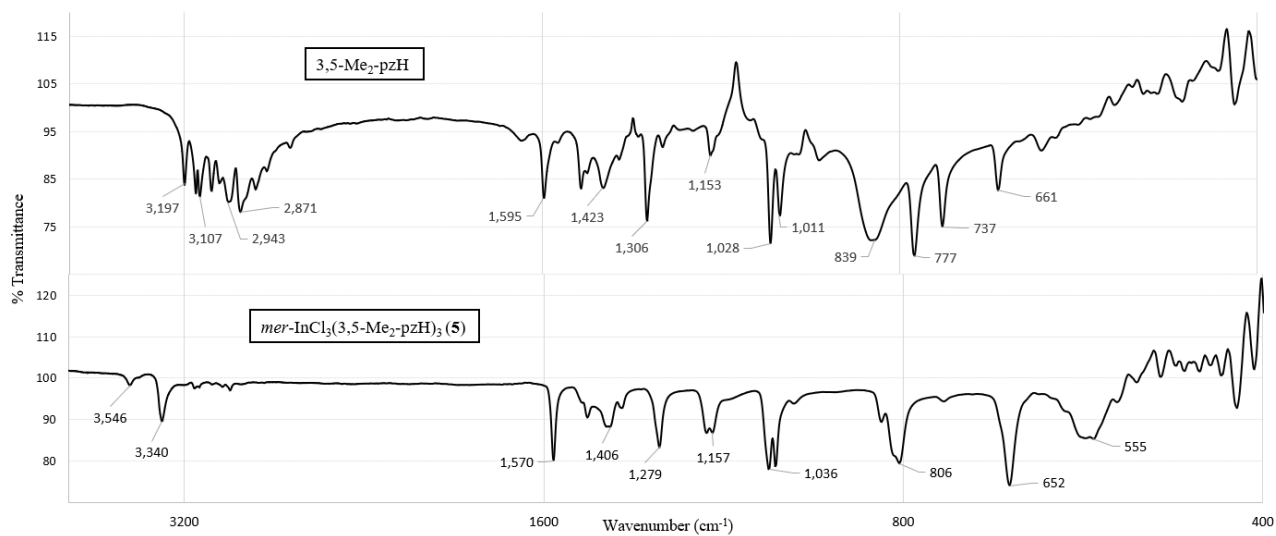

**Fig. S17.** FT-IR spectra of 3,5-Me<sub>2</sub>-pzH (top) and mer-InCl<sub>3</sub>(3,5-Me<sub>2</sub>-pzH)<sub>3</sub> (5).



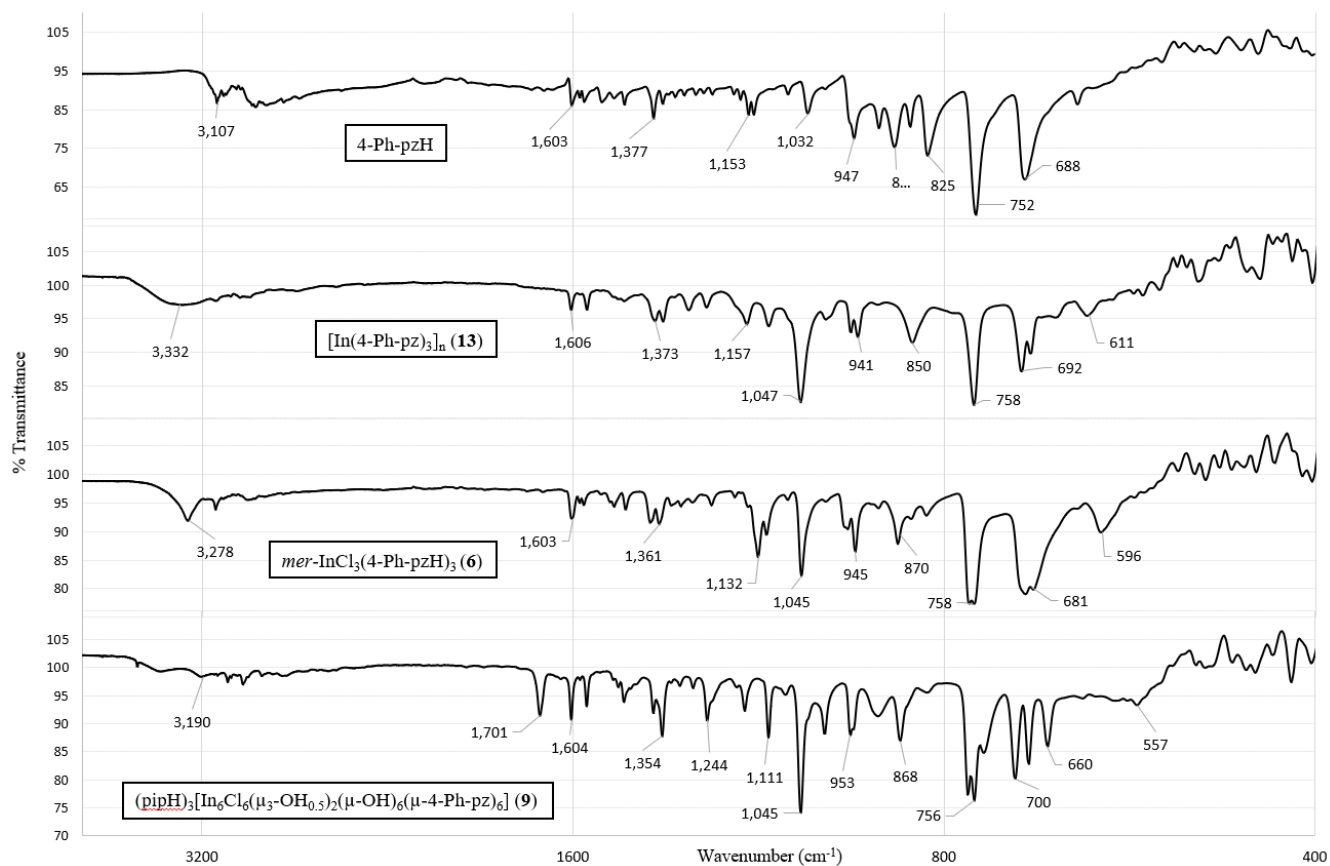

**Fig. S18.** FT-IR spectra of 4-Ph-pzH (top), [In(μ-4-Ph-pz)<sub>3</sub>]<sub>n</sub> (**13**), *mer*-InCl<sub>3</sub>(4-Ph-pzH)<sub>3</sub> (**6**), (pipH)<sub>3</sub>[In<sub>6</sub>Cl<sub>6</sub>(μ<sub>3</sub>-OH<sub>0.5</sub>)<sub>2</sub>(μ-OH)<sub>6</sub>(μ-4-Ph-pz)<sub>6</sub>] (**9**).

### Crystal structures ellipses-and-sticks model

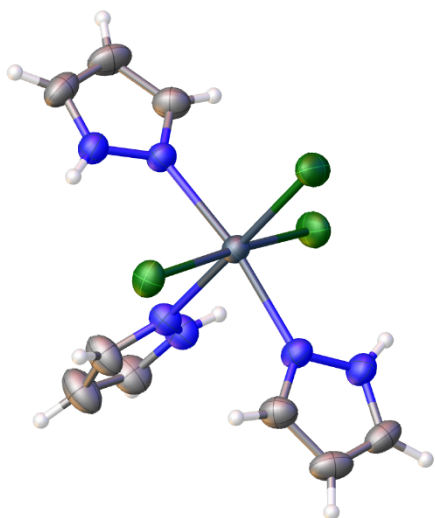

**Fig. S19.** *mer*-InCl<sub>3</sub>(pzH)<sub>3</sub> (**1**)

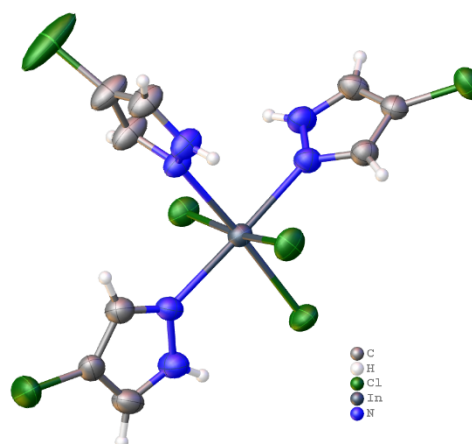

**Fig. S20.** *mer*-InCl<sub>3</sub>(4-Cl-pzH)<sub>3</sub> (**2**)

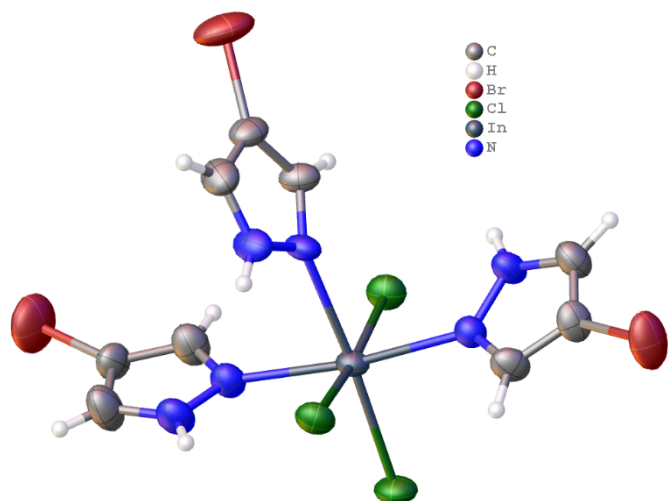

**Fig. S21.** *mer*-InCl<sub>3</sub>(4-Br-pzH)<sub>3</sub> (**3**)

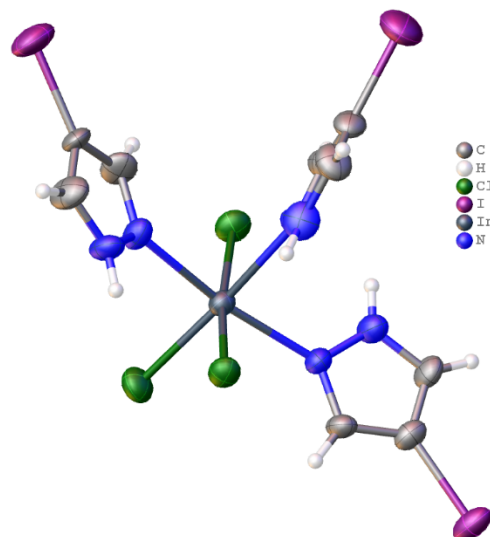

**Fig. S22.** *mer*-InCl<sub>3</sub>(4-I-pzH)<sub>3</sub> (**4**)

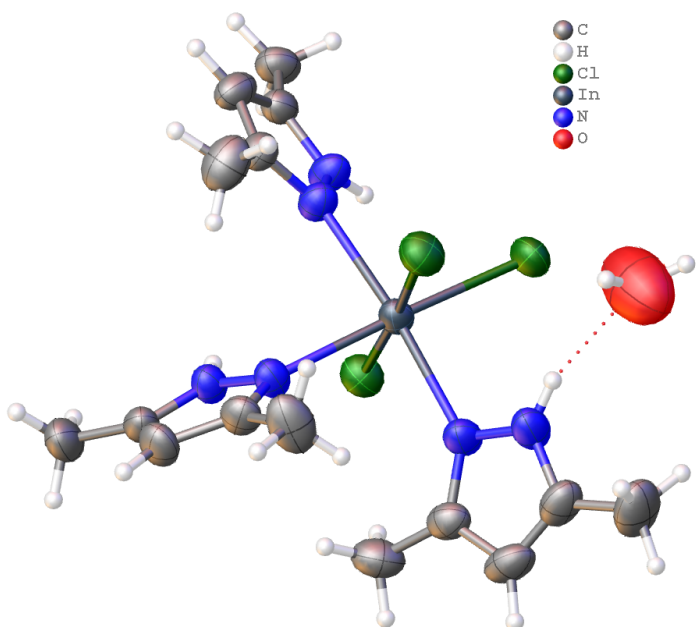

**Fig. S23.** *mer*-InCl<sub>3</sub>(3,5-Me<sub>2</sub>-pzH)<sub>3</sub> (**5**)

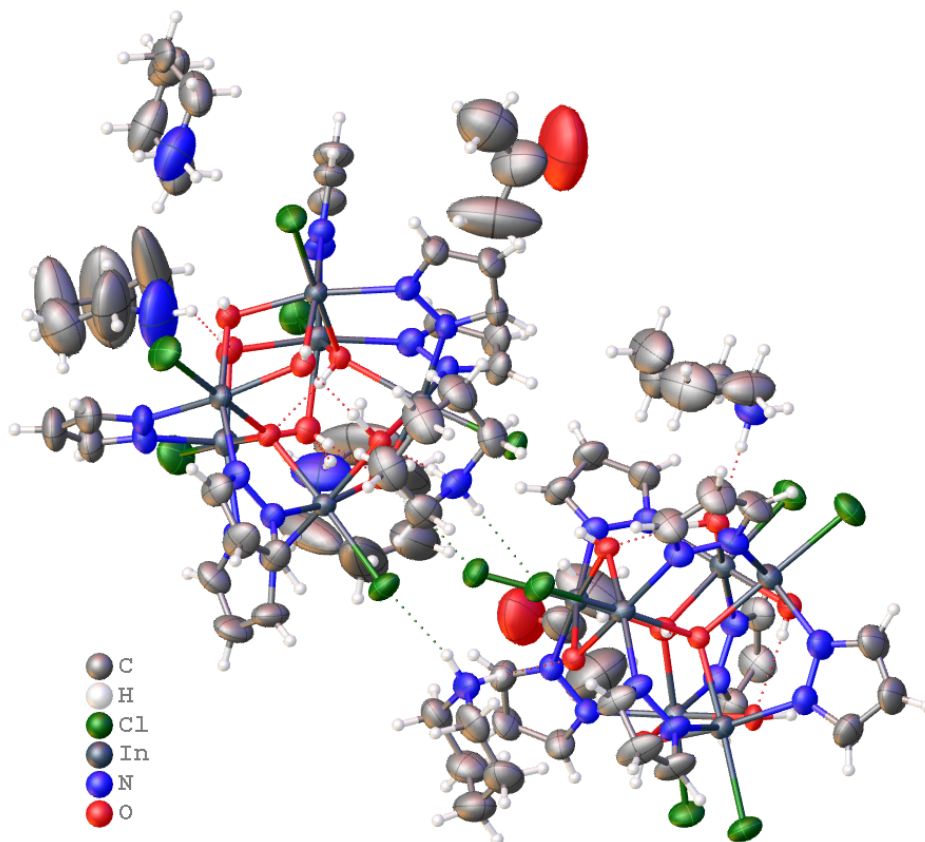

**Fig. S24.**  $(\text{pipH})_3[\text{In}_6\text{Cl}_6(\mu_3\text{-OH}_{0.5})_2(\mu\text{-OH})_6(\mu\text{-pz})_6]$  (**7**)

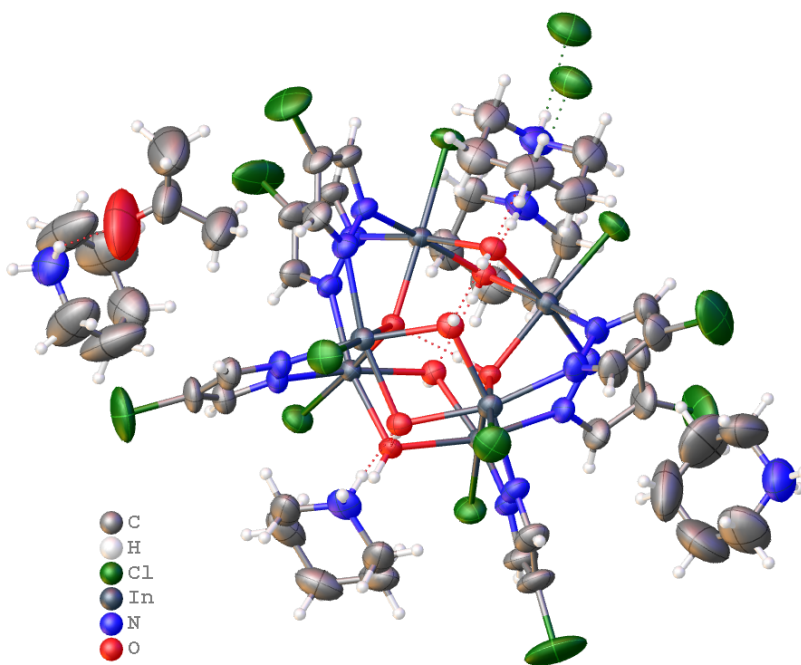

**Fig. S25.**  $(\text{pipH})_3[\text{In}_6\text{Cl}_6(\mu_3\text{-OH}_{0.5})_2(\mu\text{-OH})_6(\mu\text{-4-Cl-pz})_6]$  (**8**)

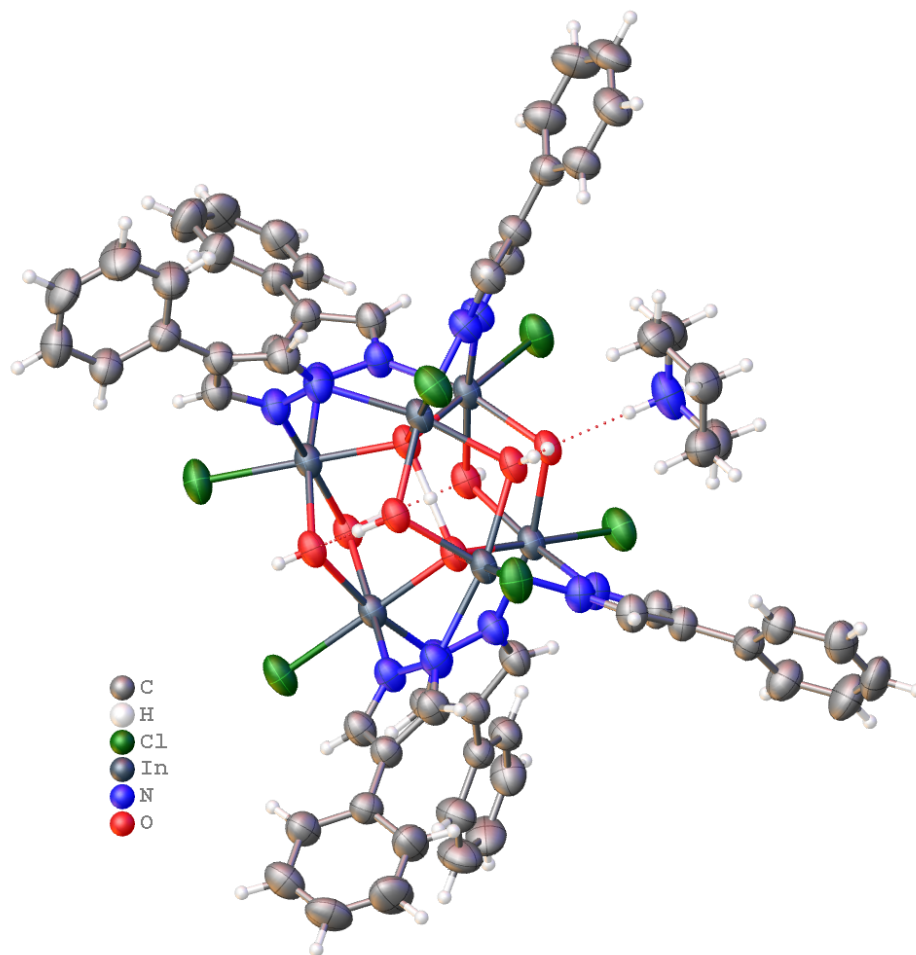

**Fig. S26.**  $(\text{pipH})_3[\text{In}_6\text{Cl}_6(\mu_3\text{-OH}_{0.5})_2(\mu\text{-OH})_6(\mu\text{-4-Ph-pz})_6]$  (**9**)
